# Supplementary material for: Ultrasensitive detection of tumor-derived small extracellular vesicles based on nonlinear hybridization chain reaction fluorescence signal amplification and immunomagnetic separation
Source: Royal Society of Chemistry journal article supplement (doi:10.1039/d2an00242f), 2022-01-01
Supplement: d2an00242f1.pdf [file d2an00242f1.pdf]

## Supporting Information

### Ultrasensitive Detection of Tumor-Derived Small Extracellular Vesicles Based on Nonlinear Hybridization Chain Reaction Fluorescence Signal Amplification and Immunomagnetic Separation

Qianqian Kong,<sup>a</sup> Shasha Cheng,<sup>a</sup> Xinyu Hu,<sup>a</sup> Jia You,<sup>a</sup> Cuiling Zhang<sup>\*a</sup> and Yuezhong Xian<sup>\*a</sup>

#### General experimental section

**Figure S1.** Absorption intensities at 450 nm for bare (control) and MBs-CD63.

**Figure S2.** Fluorescence spectra for sEVs detection *via* nHCR with or without free CD63 protein.

**Figure S3.** Fluorescence spectra corresponding to lanes 6 and 7 in Figure 3 (B).

**Table S1.** Sequences of oligonucleotides used in this work.

**Table S2.** Comparison of the present method with other approaches for sEVs detection.

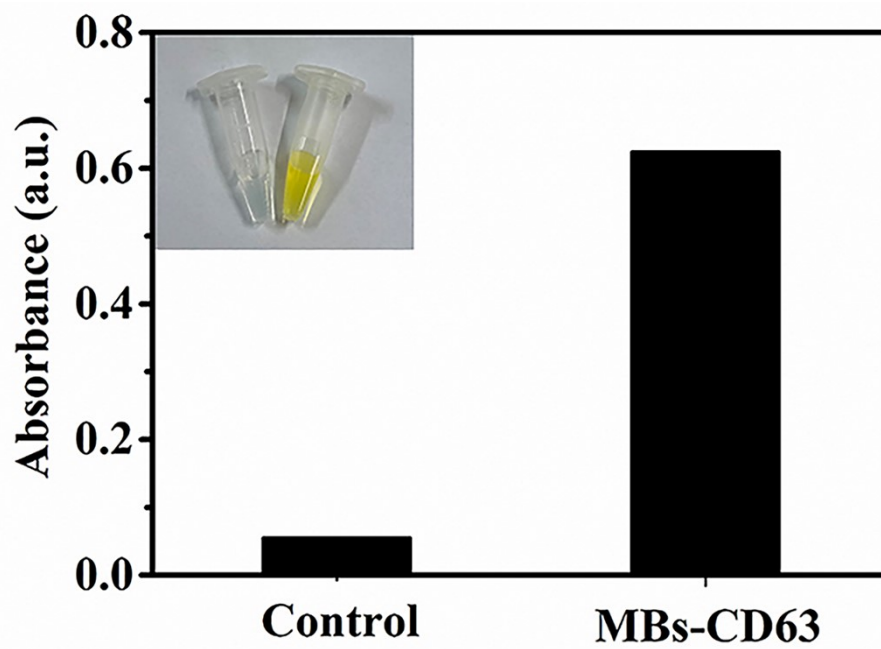

**Figure S1.** Absorption intensities at 450 nm for bare (control) and MBs-CD63. Inset is the corresponding digital photo.

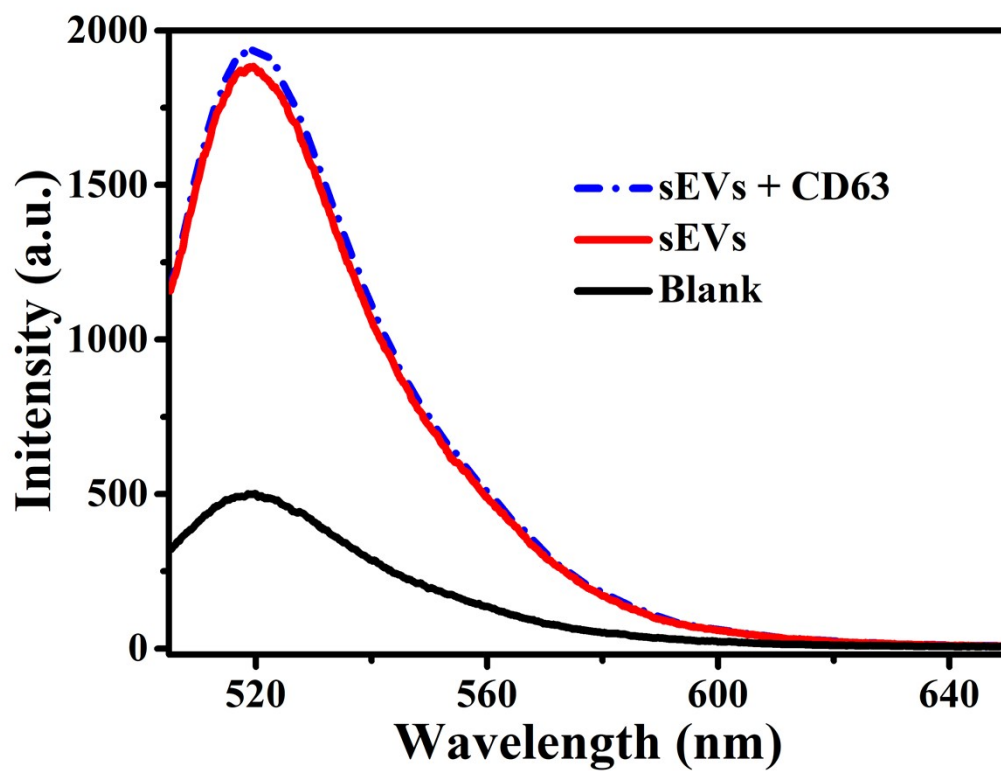

**Figure S2.** Fluorescence spectra for sEVs detection *via* nHCR with or without free CD63 protein.

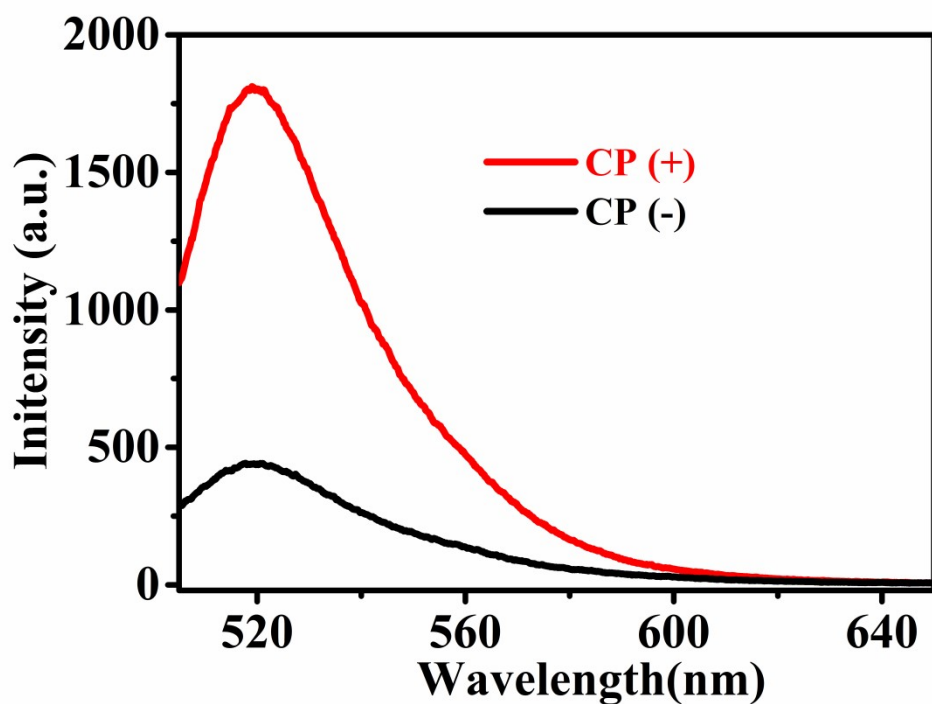

**Figure S3.** Fluorescence spectra corresponding to lanes 6 and 7 in **Figure 3 (B)**.

**Table S1.** Summary of DNA sequence information used in this work

| Name (abbreviation) | Sequences (5' to 3')                                  | Modification       |
|---------------------|-------------------------------------------------------|--------------------|
| H1                  | TTTTTTTTTTTTTTAACCGAATCCTAGACTCAAAGTAGTCTAG<br>GATTC  | 5'Biotin,<br>3'FAM |
| H2                  | TTTTTTTTTTTTTTAGTCTAGGATTCGGTTAAGAATCCTAGACTA<br>CTTG | 5'Biotin,<br>3'FAM |
| CP                  | AGTCTAGGATTCGGTTAA                                    | 3'cholesterol      |
| CCP                 | GAATCCTAGACT                                          | 3'FAM              |

**Table S2.** Comparison of the present method with other approaches for sEVs detection.

| Detection Method         | Sensing Strategy                                                                             | LOD (particles/ $\mu$ L) | Linear range (particles/ $\mu$ L)     | Ref.      |
|--------------------------|----------------------------------------------------------------------------------------------|--------------------------|---------------------------------------|-----------|
| Fluorescence             | GO nanoprobe / enzyme-mediated signal amplification                                          | $1.6 \times 10^2$        | $1.6 \times 10^2 - 1.6 \times 10^5$   | 1         |
| Fluorescence             | Dual signal amplification platform based on rolling circle amplification                     | $1.0 \times 10^2$        | $1.0 \times 10^3 - 1.0 \times 10^5$   | 2         |
| Fluorescence             | Bivalent cholesterol anchored enzyme-free DNA circuits signal amplification                  | $1.29 \times 10^3$       | $5.5 \times 10^3 - 1.1 \times 10^7$   | 3         |
| Fluorescence             | TdT-catalyzed polymerization based on steric hindrance-controlled signal amplification       | $4.8 \times 10^2$        | $1.66 \times 10^3 - 1.66 \times 10^6$ | 4         |
| Fluorescence             | Bicolor exosomal phenotyping based on multivalence-actuated DNA nanomachines                 | 33                       | $4.5 \times 10 - 4.5 \times 10^5$     | 5         |
| Electrochemistry         | Aptamer-based exonuclease III (Exo III)-assisted recycling amplification                     | 12                       | $3.4 \times 10^1 - 3.4 \times 10^5$   | 6         |
| Electrochemistry         | Electrochemical aptasensor based on click chemistry and the DNA HCR for signal amplification | 96                       | $1.12 \times 10^2 - 1.12 \times 10^8$ | 7         |
| Colorimetry              | Enzyme-catalyzed metallization of Au nanorods and hybridization chain reaction               | $1.6 \times 10^2$        | $1.4 \times 10^3 - 9.0 \times 10^6$   | 8         |
| Colorimetry              | HRP-catalyzed $H_2O_2$ -mediated oxidation of TMB                                            | $2.2 \times 10^3$        | $1.8 \times 10^4 - 7.9 \times 10^5$   | 9         |
| Raman scattering         | A novel Raman probe based on self-assembly of gold nanoparticles in triangular pyramid DNA   | $1.1 \times 10^2$        | $3.125 \times 10^4 - 1.0 \times 10^6$ | 10        |
| Electrochemiluminescence | Aptamer-binding DNA walking machine for signal amplification                                 | 60                       | $2.0 \times 10^2 - 7.5 \times 10^4$   | 11        |
| Fluorescence             | Nonlinear HCR fluorescence signal amplification based on immunomagnetic separation           | 80                       | $2.0 \times 10^2 - 8.0 \times 10^6$   | This work |

## References

1. D. Jin, F. Yang, Y. Zhang, L. Liu, Y. Zhou, F. Wang and G. J. Zhang, *Anal. Chem.* 2018, **90**, 14402–14411.
2. L. Huang, D. B. Wang, N. Singh, F. Yang, L. Hai, N. Gu and X. E. Zhang, *Nanoscale*, 2018,**10**, 20289-20295.
3. X. Wang, H. Shang, C. Ma and L. Chen, *Anal. Chem.* 2021, **93**, 8493-8500.
4. Y. Pan, L. Wang, Y. Deng, M. Wang, Y. Peng, J. Yang and G. Li, *Chem. Commun.* 2020, **56**, 13768–13771.
5. D. Jin, X. X. Peng, Y. Qin, P. Wu, H. Lu, L. Wang, J. Huang, Y. Li, Y. Zhang, G. Zhang and F. Yang, *Anal. Chem.* 2020, **92**, 9877-9886.
6. X. Yin, T. Hou, B. Huang, L. Yang and F. Li, *Chem. Commun.* 2019, **55**, 13705-13708.
7. Y. An, T. Y. Jin, Y. Y. Zhu, F. Zhang and P. G. He, *Biosens. Bioelectron.* 2019, **142**,111503.
8. Y. Z. Zhang, D. N. Wang, S. Yue, Y. B. Lu, C. G. Yang, J. Fang and Z. R. Xu, *ACS Sens.* 2019, **4** (**12**), 3210-3218.
9. F. He, H. Liu, X. G. Guo, B. C. Yin and B. C. Ye, *Anal. Chem.* 2017, **89** (**23**), 12968-12975.
10. X. Zhang, C. Liu, Y. Pei, W. Song and S. Zhang, *ACS Appl. Mater. Interfaces.* 2019, **11**, 28671–28680.
11. Q. M. Feng, P. Ma, Q. H. Cao, Y. H. Guo and J. J. Xu, *Chem. Commun.* 2020, **56**, 269–272.
